# Supplementary material for: Apical ectodermal ridge morphogenesis in limb development is controlled byArid3b-mediated regulation of cell movements
Source: Oxford University Press journal article supplement (doi:10.1242/dev.057570), 2011-02-10

**Table S1. Gain-of-function assays in chicken embryos**

| <b>A Electroporation of wild-type Arid3b and collection of embryos at 48 hours (total electroporated embryos=37)</b> |                                         |                                              |
|----------------------------------------------------------------------------------------------------------------------|-----------------------------------------|----------------------------------------------|
| Alterations in AER morphology: 92% ( $n=34/37$ ) (a)*                                                                |                                         | No apparent phenotype: 8% ( $n=3/37$ )       |
| AER with abnormal shape: 74% ( $n=25/34$ )                                                                           |                                         | Partial absence of AER: 26% ( $n=9/34$ ) (e) |
| With branched AER: 40% ( $n=10/25$ ) (b)                                                                             | AER not branched: 60% ( $n=15/25$ ) (d) |                                              |
| One case with ectopic patch of Fgf8 expression away from endogenous AER (c)                                          |                                         |                                              |
| <b>B Electroporation of wild-type Arid3b and collection of embryos at 72 hours (total electroporated embryos=15)</b> |                                         |                                              |
| Alterations in AER morphology: 100% ( $n=15/15$ ) (f)                                                                |                                         | No apparent phenotype: 0% ( $n=0/15$ )       |
| AER with abnormal shape: 87% ( $n=13/15$ )                                                                           |                                         | Partial absence of AER: 13% ( $n=2/15$ ) (j) |
| With branched AER: 77% ( $n=9/13$ ) (f,g)                                                                            | AER not branched: 23% ( $n=4/13$ ) (i)  |                                              |
| One case with ectopic patch of Fgf8 expression away from endogenous AER (h)                                          |                                         |                                              |
| *Letters in parentheses refer to images below, examples of each case.                                                |                                         |                                              |

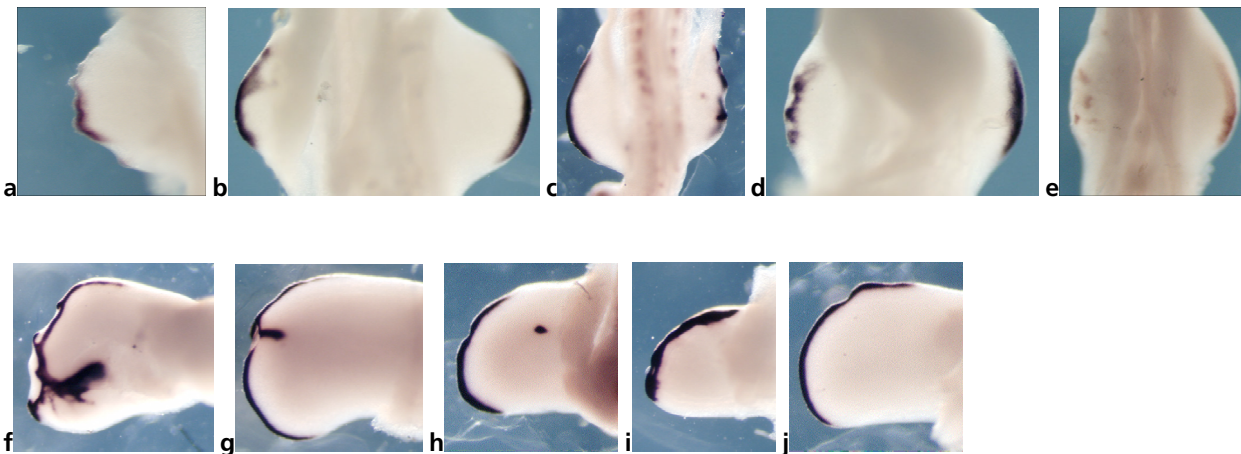

Supplement: dev057570tables1.pdf [file dev057570tables1.pdf]
