# Supplementary material for: Apical ectodermal ridge morphogenesis in limb development is controlled byArid3b-mediated regulation of cell movements
Source: Oxford University Press journal article supplement (doi:10.1242/dev.057570), 2011-02-10
Supplement: dev057570tables2.pdf [file dev057570tables2.pdf]

**Table S2A. Complete data of proliferation/apoptosis in electroporated chicken embryos**

|               |                                                        | Arid3b wild type 30 hours control | Arid3b wild type 30 hours electroporated | Arid3b DN 30 hours control | Arid3b DN 30 hours electroporated | Arid3b DN 72 hours control | Arid3b DN 72 hours electroporated |
|---------------|--------------------------------------------------------|-----------------------------------|------------------------------------------|----------------------------|-----------------------------------|----------------------------|-----------------------------------|
| Proliferation | Number of specimens                                    | 3                                 | 3                                        | 3                          | 3                                 | 3                          | 3                                 |
|               | Number of sections                                     | 22                                | 27                                       | 29                         | 29                                | 25                         | 9                                 |
|               | Number total Fgf8+ cells analysed                      | 675                               | 779                                      | 1093                       | 1157                              | 1011                       | 448                               |
|               | Number of Fgf8+ cells per section                      | 30.68                             | 28.85                                    | 37.69                      | 39.90                             | 40.44                      | 49.77                             |
|               | Number of total BrdU+ cells                            | 112                               | 125                                      | 200                        | 193                               | 166                        | 96                                |
|               | Percentage of BrdU+ cells per AER section average±s.d. | 16.66±11.78                       | 16.04±10.10                              | 18.29±9.26                 | 16.68±9.35                        | 16.40±8.92                 | 21.42±15.77                       |
|               | Probability Student's t-test                           | 0.36                              |                                          | 0.40                       |                                   | 0.26                       |                                   |
| Apoptosis     | Number of specimens                                    | 3                                 | 3                                        | 3                          | 3                                 | 3                          | 3                                 |
|               | Number of sections                                     | 15                                | 16                                       | 27                         | 30                                | 18                         | 18                                |
|               | Number total Fgf8+ cells analysed                      | 401                               | 429                                      | 1109                       | 1103                              | 724                        | 596                               |
|               | Number of Fgf8+ cells per section                      | 26.73                             | 26.81                                    | 41.07                      | 36.77                             | 40.22                      | 33.11                             |
|               | Number of total TUNEL+ cells                           | 15                                | 14                                       | 61                         | 57                                | 36                         | 1                                 |
|               | Percentage of TUNEL+ cells per AER section mean±s.d.   | 3.74±5.46                         | 3.26±4.23                                | 5.50±4.86                  | 5.17±5.56                         | 4.97±5.45                  | 0.16±0.87                         |
|               | Probability Student's t-test                           | 0.30                              |                                          | 0.29                       |                                   | 0.0003***                  |                                   |

**Table S2B. Complete data of proliferation/apoptosis in mouse embryos**

|               |                                                         | Arid3b wild type | Arid3b knockout |
|---------------|---------------------------------------------------------|------------------|-----------------|
| Proliferation | Number of specimens                                     | 3                | 3               |
|               | Number of sections                                      | 28               | 29              |
|               | Number total Fgf8+ cells analysed                       | 1035             | 707             |
|               | Number of Fgf8+ cells per section                       | 36.96            | 24.37           |
|               | Number of total BrdU+ cells                             | 43               | 13              |
|               | Percentage of BrdU+ cells per AER section average±s.d.  | 4.15±3.8         | 1.84±3.01       |
|               | Probability Student's t-test                            | 0.015*           |                 |
| Apoptosis     | Number of specimens                                     | 3                | 3               |
|               | Number of sections                                      | 55               | 25              |
|               | Number total Fgf8+ cells analysed                       | 1999             | 673             |
|               | Number of Fgf8+ cells per section                       | 36.35            | 26.92           |
|               | Number of total TUNEL+ cells                            | 286              | 34              |
|               | Percentage of TUNEL+ cells per AER section average±s.d. | 14.30±14.38      | 5.05±7.20       |
|               | Probability Student's t-test                            | 0.001***         |                 |
